1     **The hyperlipidaemic drug fenofibrate significantly reduces infection by SARS-**  
2                                     **CoV-2 in cell culture models**

3

4     **Short title: Fenofibrate inhibits SARS-CoV-2 infection.**

5

6     **Scott P. Davies<sup>1</sup>, Courtney J. Mycroft-West<sup>2</sup>, Isabel Pagani<sup>3</sup>, Harriet J. Hill<sup>1</sup>,**  
7     **Yen-Hsi Chen<sup>4</sup>, Richard Karlsson<sup>4</sup>, Ieva Bagdonaite<sup>4</sup>, Scott E. Guimond<sup>2</sup>, Zania**  
8     **Stamataki<sup>1</sup>, Marcelo Andrade De Lima<sup>2</sup>, Jeremy E. Turnbull<sup>4,5</sup>, Zhang Yang<sup>4</sup>,**  
9     **Elisa Vicenzi<sup>3</sup>, Mark A. Skidmore<sup>2</sup>, Farhat Khanim<sup>6,\*</sup>, # and Alan Richardson<sup>7,\*</sup>, #**

10

11             1. Institute for Immunology and Immunotherapy  
12                 University of Birmingham  
13                 Birmingham  
14                 B15 2TT  
15                 United Kingdom

16

17             2. Molecular & Structural Bioscience  
18                 School of Life Sciences  
19                 Keele University  
20                 Staffordshire  
21                 ST5 5BG  
22                 United Kingdom

23

24             3. Viral Pathogenesis and Biosafety Unit  
25                 San Raffaele Scientific Institute  
26                 Via Olgettina, 58  
27                 Milano,  
28                 Italy

29

30             4. Copenhagen Center for Glycomics,  
31                 Department of Cellular & Molecular Medicine, Faculty of Health Sciences,  
32                 University of Copenhagen,  
33                 Copenhagen N 2200  
34                 Denmark.

35

36             5. Department of Biochemistry and Systems Biology,  
37                 Institute of Systems, Molecular and Integrative Biology,  
38                 University of Liverpool,  
39                 Liverpool  
40                 L69 7ZB  
41                 United Kingdom

42

43             6. School of Biomedical Sciences, Institute for Clinical Sciences  
44                 University of Birmingham

45 Birmingham  
46 B15 2TT  
47 United Kingdom  
48  
49 7. School of Pharmacy and Bioengineering  
50 Keele University  
51 Staffordshire  
52 ST5 5BG  
53 United Kingdom  
54

55 # Joint last authors

56 \* To whom correspondence should be addressed.

57 [a.richardson1@keele.ac.uk](mailto:a.richardson1@keele.ac.uk)

58 [F.L.Khanim@bham.ac.uk](mailto:F.L.Khanim@bham.ac.uk)

59

60

61

62

### 63 **Abbreviations**

64  $C_{ss}$ , steady-state plasma concentration

65  $C_{max}$ , maximum plasma concentration

66 LgBIT Large binary interaction technology

67 HiBIT High affinity binary interaction technology

68 RBD Receptor binding domain

69 ACE2 Angiotensin converting enzyme 2

70 SARS Severe acute respiratory syndrome

71 ELISA Enzyme -linked immunosorbent assay

72

73 **Abstract**

74 The SARS-CoV-2 pandemic has caused a significant number of fatalities and  
75 worldwide disruption. To identify drugs to repurpose to treat SARS-CoV-2 infections,  
76 we established a screen to measure dimerization of ACE2, the primary receptor for  
77 the virus. This screen identified fenofibric acid, the active metabolite of fenofibrate.  
78 Fenofibric acid also destabilized the receptor binding domain (RBD) of the viral spike  
79 protein and inhibited RBD binding to ACE2 in ELISA and whole cell binding assays.  
80 Fenofibrate and fenofibric acid were tested by two independent laboratories  
81 measuring infection of cultured Vero cells using two different SARS-CoV-2 isolates.  
82 In both settings at drug concentrations which are clinically achievable, fenofibrate  
83 and fenofibric acid reduced viral infection by up to 70%. Together with its extensive  
84 history of clinical use and its relatively good safety profile, these studies identify  
85 fenofibrate as a potential therapeutic agent requiring urgent clinical evaluation to  
86 treat SARS-CoV-2 infection.

87

88 **Teaser**

89 The approved drug fenofibrate inhibits infection by SARS-COV-2

90

91

## 92 **Introduction**

93 Severe acute respiratory syndrome coronavirus-2 (SARS-CoV-2) is responsible for a  
94 pandemic which has cost over 1.9 million lives worldwide so far (1-3). The  
95 emergence of new virus variants with higher transmissibility rates is seeing rapid  
96 increases in infection rates and deaths across the world. Several vaccines have  
97 undergone accelerated approval and are being rolled out worldwide (4,5). Whilst the  
98 data from clinical trials is very promising, the vaccines may not be suitable in all  
99 patient groups e.g. those with hyperimmune disorders and those using  
100 immunosuppressants, and it is presently unclear whether the current vaccines offer  
101 protection to newly emerging strains of the virus. In addition, it will take considerable  
102 time to vaccinate everyone and we are yet unsure of the strength and duration of the  
103 response. Therapies are still urgently needed to manage patients who develop  
104 severe symptoms and/or require hospitalisation.

105 The virus gains entry to human cells by the receptor binding domain (RBD) of the  
106 viral Spike protein binding to angiotensin converting enzyme-2 (ACE2) on human  
107 cells (6,7). Although other receptors of the virus have been identified (8,9), drugs  
108 which block virus binding to ACE2 may substantially reduce virus uptake thereby  
109 reducing/relieving symptoms in patients with an active infection or reduce  
110 transmission of the virus to uninfected individuals.

111 Whilst the rapid escalation of the SARS-CoV-2 epidemic leaves insufficient time to  
112 develop new drugs via traditional pipelines, drug repurposing offers an expedited  
113 and attractive alternative. Drugs which are repurposed are available for immediate  
114 clinical use and their pharmacokinetic and safety profiles are usually well described.  
115 This has already proven true, with the identification that dexamethasone reduces  
116 mortality of SARS-CoV-2 patients (10) and remdesivir decreases the time needed for  
117 patients to recover from infection (11). In both these cases, although the drugs are  
118 technically being repurposed, their use still depends on the drug's recognized  
119 mechanism of action. It is less obvious which drugs might have a novel mechanism  
120 of action and interfere with SARS-CoV-2 binding and cellular entry mediated by  
121 ACE2. To this end, we recently developed an assay to measure the viral spike  
122 protein's receptor binding domain (RBD) binding to ACE2 (12).

123 Structural studies have shown that ACE2 is a dimer and that there may be multiple  
124 spike RBDs interacting with each ACE2 dimer (13). Molecular dynamic simulations  
125 have suggested considerable flexibility in ACE2 and this might allow multiple ACE2  
126 dimers to bind to each spike trimer (14). It therefore seems reasonable that the  
127 extent of ACE2 dimerization might affect the avidity of RBD binding. Furthermore,  
128 dimerization has been shown to affect internalization of other receptors. For  
129 example, dimerization of EGF or FGF receptors promotes their endocytosis (15,16)  
130 and different mechanisms of internalization may exist for monomeric and dimeric GH  
131 receptors (17). This led to the hypothesis that drugs that altered dimerization of  
132 ACE2 might affect viral infection. In order to test this hypothesis, we developed an  
133 assay to measure dimerization of ACE2, making use of the NanoBIT protein  
134 interaction system (18). This is based on a modified luciferase (nanoluc) which has  
135 been split into two catalytically incomplete components, LgBIT and SmBIT, that must  
136 bind together to form an active luciferase. LgBIT and SmBIT associate with low  
137 affinity but when fused to other proteins that interact with each other, co-localization  
138 of the fusion proteins allows an active luciferase to be formed (18). Here we have  
139 used this system to measure dimerization of ACE2 and screened a library of  
140 approved drugs (FMC Library (19)) using an unsupervised approach to identify drug  
141 candidates for repurposing. Our experiments demonstrated that fenofibric acid  
142 (Figure S1), the active metabolite of the oral hyperlipidaemic drug fenofibrate,  
143 apparently induced ACE2 dimerization and destabilized the spike RBD inhibiting  
144 binding of spike-RBD to ACE2. Importantly, and as hypothesised, fenofibrate-  
145 induced changes in RBD-ACE2 interactions correlated with significantly lower  
146 infection levels (<60%) in cell culture models using live SARS-CoV-2. Our data  
147 combined with unpublished data from other groups and the existing clinical  
148 knowledge of fenofibrate identify it as a strong candidate for treating SARS-CoV-2  
149 infections.

150

151

152 **Methods**

153 *Materials*

154 The plasmid pcDNA3 encoding ACE2 was obtained from GenScript (OHu20260); the  
155 plasmid encoding prolactin (PRL) was obtained from Sino Biological (HG10275-CY).  
156 Optimem and Lipofectamine 2000 were obtained from Thermo Fisher Scientific.  
157 NanoBIT and HiBIT detection reagents, Flexicloning transfer systems (C8820 and  
158 C9320) and NanoBIT starter kit (N2015) were obtained from Promega. Anti-His  
159 antibody was from Thermo Fisher Scientific (37-2900) and Anti-FLAG from Cell  
160 Signalling Technology (#2368). The plasmid pcDNA3 encoding ACE2-Flag was  
161 obtained from GenScript (OHu20260) and pcDNA3 encoding ACE2-SBP-6xHis was  
162 obtained from Thermo Fisher Scientific.

163

164 *Molecular biology*

165 Full length ACE2 was amplified by PCR using primers (forward  
166 GACCGCGATCGCCATGTCAAGCTCTTCCTGGCTCCTTCT; reverse  
167 GATGGTTTAAACAAAGGAGGTCTGAACATCATCAGTG) to introduce a 5' Sgf1  
168 restriction site immediately prior to the start codon and a Pme1 restriction site  
169 directly after the codon encoding the last Phe residue. The PCR product was  
170 digested with flexblend (Sgf1 and Pme1), gel purified and ligated into pF4ACMV  
171 before verifying by sequencing. The insert was subsequently transferred into either  
172 pFC34K (encoding LgBIT) or pFC36K (encoding SmBIT) using the C-terminal  
173 flexicloning system to generate C-terminal fusion proteins.

174

175 *NanoBIT assay*

176 HEK-293 cells were grown in DMEM supplemented with 10% (v/v) fetal calf serum  
177 and penicillin-streptomycin (50 U/ml). For each well of a 384 plate, 1.25  $\mu$ l of  
178 Optimem containing 10 ng/ $\mu$ L of each of pFC34K ACE2 and pFC36K ACE2 was  
179 mixed with an equal volume of Optimem containing 8% lipofectamine-2000. After  
180 incubating at room temperature for 30 minutes, the transfection mix was mixed with  
181 10 volumes of well dispersed HEK-293 cells (300,000 cells/mL) in 10% FCS/DMEM

182 without antibiotics and, 25  $\mu$ L plated per well of white 384 well plates. The two outer  
183 rows of the plate were filled with 25  $\mu$ L media as a humidity barrier. After 48 hours,  
184 2.8  $\mu$ L drug at 10 x the final concentration were added per well and incubated for 1  
185 hour. Detection reagent was prepared by mixing per well 6.33  $\mu$ L of detection  
186 reagent buffer, 0.33  $\mu$ L of substrate and 8.34  $\mu$ L of Optimem containing 10 mM  
187 Hepes prewarmed to 37°C. 15  $\mu$ L detection reagent was added per well, gently  
188 mixed and luminescence read every 10 minutes over 30 minutes.

189 To test whether the drugs inhibit nanoluc directly, HiBIT-RBD was prepared as  
190 described previously (12) and the drug added to the desired final concentration,  
191 mixed with an equal volume of HiBIT detection reagent and luminescence measured.  
192 The results were compared to the luminescence measured using HiBIT-RBD  
193 containing DMSO.

194 To measure whether the drugs inhibited the binding of HiBIT-RBD to ACE2, drugs  
195 were tested in the binding assay as previously described on ice (12), Alternatively,  
196 binding was measured after 20 min at 37°C.

197

#### 198 *Precipitation of ACE2 complexes*

199 HEK-293 cells were transfected by mixing (for each well of a 6 well plate) 0.5  $\mu$ g of  
200 each pcDNA3 ACE2-Flag and pcNDA3 ACE2-SBP-6xHis in 50  $\mu$ L Optimem.  
201 pCMV3 Prolactin (PRL) was used as a negative control in the absence of plasmids  
202 encoding ACE2. 50  $\mu$ L of 8% Lipofectamine-2000 in Optimem was added to plasmid  
203 DNA and after 30 min incubation, 1 mL of HEK-293 cells (300,000 per ml) added and  
204 the suspension plated per well in 6 well plates. After 12 hours incubation, the cell  
205 culture supernatant was gently removed and replaced with fresh DMEM containing  
206 10% FCS. After a further 6 hours, the medium was again removed and the cells  
207 lysed in RIPA 250  $\mu$ L as previously described (20). Lysates were cleared by  
208 centrifugation (20,000g, 10 min, 4 °C), 30  $\mu$ L saved for analysis, whilst 200  $\mu$ L was  
209 mixed with 20  $\mu$ L of streptavidin beads for 2 hours at 4°C. The beads were washed  
210 twice with RIPA and once with Tris-buffered saline before being separated on a 4-  
211 12% SDS-PAGE gel, transferred to PVDF and proteins detected with anti-FLAG  
212 (1/1000) or anti-His (0.08  $\mu$ g/ml) antibodies.

213 *Expression of the Spike S1-Receptor Binding Domain for ELISA*

214 Secreted Spike S1 Receptor Binding Domain (RBD) was produced stably using  
215 CHOZN GS<sup>-/-</sup> cells in suspension employing a plasmid encoding residues 319–591  
216 of 2019-nCoV S (upstream of a C-terminal HRV3C protease cleavage site, mFc tag  
217 and 8xHis Tag; gifted by Jason S. McLellan, University of Texas, Austin), as  
218 described by Tree et al (2020). Coding region of RBD-Fc was subcloned into a  
219 modified pCGS3 (Merck/formally known as Sigma-Aldrich) for glutamine selection in  
220 CHOZN GS<sup>-/-</sup> cells. Briefly, RBD-Fc stable clone was obtained by electroporation  
221 with 2x10<sup>6</sup> cells and 5 µg endotoxin-free plasmids using Amaxa kit V and program  
222 U24 with Amaxa Nucleofector 2B (Lonza, Switzerland). Electroporated cells were  
223 subsequently plated in 96-wells at 500 cells/well in Plating Medium containing 80%  
224 EX CELL® CHO Cloning Medium (Cat.no C6366) and EX-CELL CHO CD Fusion  
225 serum-free media without glutamine. High expressing clones were scaled-up in  
226 serum-free media without L-glutamine in 50 mL TPP TubeSpin® shaking Bioreactors  
227 (180 rpm, 37°C and 5% CO<sub>2</sub>) for RBD-Fc production. A HiTrap Protein G, HP  
228 column (GE Healthcare, US), equilibrated in 1x PBS prior to use, was employed to  
229 purify the Spike S1 RBD, eluting with glycine (100 mM, pH 2.7). Purity was  
230 confirmed using SDS-PAGE with Coomassie stain and quantified using the  
231 bicinchoninic acid assay (Thermo Scientific).

232

233 *ELISA assay measuring RBD-ACE2 binding*

234 An RBD-ACE2 inhibition ELISA was performed as described by Tree et al (2020).  
235 Streptavidin (3 µg/mL; Fisher) was precoated onto the surface of 96 well plates (high  
236 binding; Greiner) in Na<sub>2</sub>CO<sub>3</sub> buffer (50 mM; pH 9.6; 1 hour; 37°C). Plates were  
237 washed 3x (300 µL PBS containing 0.2% w/v Brij35) prior to blocking for 1 hour at  
238 37°C with 50 µL PBS, 0.2% w/v Brij35, 1% w/v casein. After washing 3x with PBS,  
239 plates were coated with 50 µL of 100 ng/mL biotin-ACE2 (Sino Biological) in PBS  
240 containing 0.2% w/v Brij35, 1% w/v casein for 1 hour at 37°C. Plates were then  
241 washed and incubated at room temperature in 50 µL of 5 µg/mL RBD in PBS  
242 containing 0.2% w/v Brij35, 1% w/v casein for 30 minutes in the presence or  
243 absence of test drugs. Plates were incubated (1 hour; 37°C) to allow binding before  
244 3 washes. Bound RBD was detected by incubation (1 hour; 37°C) with rabbit anti-



245 SARS-CoV-2-Spike-RBD (Stratech) (1:2000 v/v in PBS containing 0.2% w/v Brij35,  
246 1% w/v casein. Following 3 further washes, plates were incubated (30 mins.; at  
247 37°C) with horseradish peroxidase-conjugated donkey anti-rabbit IgG (1:2500 v/v, in  
248 PBS containing w/v Brij35, 1% w/v casein. Plates were washed five times before the  
249 addition of 3,3',5,5'- tetramethylbenzidine substrate, prepared as per manufacturer's  
250 instructions (Sigma-Aldrich). Colour development was halted after 10 mins by the  
251 addition of H<sub>2</sub>SO<sub>4</sub> (2 M) and quantified at  $\lambda_{\text{abs}} = 450 \text{ nm}$  using a Tecan Infinite M200  
252 Pro multi-well plate reader (Tecan Group). Specific binding was determined by  
253 subtracting the absorbance measured in samples lacking ACE2.

254

#### 255 *Differential scanning fluorimetry*

256 Differential scanning fluorimetry (DSF) was conducted with 1  $\mu\text{g}$  RBD in 40  $\mu\text{L}$  PBS  
257 (pH 7.6) with 1.25x SYPRO<sup>TM</sup> Orange (Invitrogen) and either, H<sub>2</sub>O, sodium acetate  
258 or fibrates in 96-well qPCR plates (AB Biosystems). An AB Biosystems, StepOne  
259 plus, qPCR machine with a TAMRA filter was employed to perform melt curve  
260 experiments, increasing the temperature by +0.5°C every 30 seconds, from 25 -  
261 90°C. First-order differential plots were calculated after smoothing (Savitzky-Golay, 9  
262 neighbours, 2<sup>nd</sup>-order polynomial) using Prism 8 (GraphPad). The peak maxima of  
263 the first-order differential plots were determined with MatLab software (R20018a,  
264 MathWorks) and used to calculate the change in  $T_m$  in the presence of fibrates.  
265 Control wells without RBD, but containing sodium acetate or fibrates, were tested to  
266 confirm that altered  $T_m$  values were a result of protein-ligand interactions and not a  
267 result of an interaction between the drug and the dye.

268

#### 269 *SARS-CoV-2 infection experiments (hCOV-19/England/2/202 strain)*

270 Vero cells (ATCC® CCL-81) were washed with PBS, dislodged with 0.25% Trypsin-  
271 EDTA (Sigma life sciences) and seeded into 96-well imaging plates (Greiner) at a  
272 density of  $8 \times 10^3$ /well in culture media (DMEM containing 10% FBS, 1% Penicillin  
273 and Streptomycin, 1% L-Glutamine and 1% non-essential amino acids). The next  
274 day, cells were infected with SARS-CoV-2 strain hCOV-19/England/2/2020, isolated

275 by Public Health England (PHE) from the first patient cluster in the United Kingdom  
276 on 29 January 2020. Virus stock  $10^6$  IU/ml (kind gift from Christine Bruce, Public  
277 Health England) was diluted 1/150 in culture media allowing 25  $\mu$ l per well. Virus was  
278 then diluted further with 25 $\mu$ l per well media containing treatments of interested  
279 prepared at 2X concentration to give 1x drug and a final virus dilution of 1/300. Cells  
280 were then infected with virus (167 IU/well) and cultured for 24 or 48 hr. After the  
281 infection period, supernatants were harvested and frozen prior to analysis by qRT-  
282 PCR, and cells were fixed in ice-cold methanol. Cells were then blocked in PBS  
283 containing 10% FBS and stained with rabbit anti-SARS-CoV-2 spike protein, subunit  
284 1 (The Native Antigen Company), followed by Alexa Fluor 555-conjugated goat anti-  
285 rabbit IgG secondary antibody (Invitrogen, Thermo Fisher Scientific). Cell nuclei  
286 were stained with Hoechst 33342 (Thermo Fisher Scientific). After washing with  
287 PBS, cells were imaged and analysed using a Thermo Scientific CellInsight CX5  
288 High-Content Screening (HCS) platform. Infected cells were scored by perinuclear  
289 fluorescence above a set threshold determined by positive (untreated) and negative  
290 (uninfected) controls. A minimum of 9 fields and 5000 nuclei per well in triplicate or  
291 quadruplicate wells per treatment were scored in each experiment. All experiments  
292 were performed 2-4 times.

293

#### 294 *SARS-CoV-2 plaque formation assay (Italy/UniSR1/2020 strain)*

295 Vero cells were plated at  $2.5 \times 10^5$  cell/well in 24-well plates in Essential-modified  
296 Eagle Medium (EMEM, Lonza) supplemented with 10% fetal calf serum (FCS,  
297 EuroClone) (complete medium). Twenty-four hours later, cells were incubated with  
298 compounds in 250  $\mu$ l of complete medium 1 hour prior to infection and then  
299 incubated with virus suspension (pre-treatment) containing 50 plaque forming units  
300 (PFU) of Italy/UniSR1/2020 strain (GISAID accession ID: EPI\_ISL\_413489). After  
301 incubation for 1 hour at 37°C, supernatants were discarded, 500  $\mu$ l of 1%  
302 methylcellulose (Sigma Chemical Corp) overlay dissolved in complete medium was  
303 added to each well. Alternatively, Vero cells were incubated with compounds  
304 together with a virus suspension containing 50 PFU (co-treatment) in a total volume  
305 of 300  $\mu$ l complete medium for 1 hour. Supernatants were discarded and the  
306 methylcellulose overlay was added as described above. After 3 days, cells were

307 fixed using 6% formaldehyde/PBS solution for 10 minutes and stained with 1%  
308 crystal violet (Sigma Chemical Corp) in 70% methanol for 1 hour. The plaques were  
309 counted under a stereoscopic microscope (SMZ-1500, Nikon).

310

#### 311 *Quantitative Real time PCR for SARS-CoV-2*

312 Cell culture supernatant from infection experiments was heat-inactivated at 56°C for  
313 60 mins following PHE protocols in the NHS Turnkey Labs based in the University of  
314 Birmingham Medical School. Viral RNA was reverse transcribed and quantified in  
315 culture supernatant using the 1-step SARS-CoV-2 Viasure Real Time PCR Detection  
316 Kit (Prolab Diagnostics/CerTest Biotec) according to manufacturer's instructions.  
317 Briefly, 15µl of rehydrated Reaction-Mix was combined with 5µl of either heat-  
318 inactivated cell culture supernatant, positive virus RNA control or negative control  
319 before cycling in an Agilent AriaMX Real-Time thermal cycler using the following  
320 cycle conditions: reverse transcription at 45°C for 15 mins, initial denaturation at  
321 95°C for 2 mins followed by 45 cycles of 95°C for 10 sec, 60°C for 50 sec.  
322 Fluorimetric data was collected during the extension step for FAM (ORF1ab gene),  
323 ROX (N gene) and Hex (internal control) and Cycle thresholds (Ct) calculated for  
324 each gene. Relative expression was calculated by subtracting the Virus Control Ct  
325 values from drug treatment samples and transforming the data using  $2^{-\Delta C_t}$ .

326

#### 327 *Statistical analysis*

328 All pairwise comparisons were performed using paired T-Tests or Mann-Whitney U  
329 tests where normal distribution was not assumed. Multiple comparisons were done  
330 using ANOVA.

331

## 332 **Results**

### 333 *Validation of ACE2 dimerization assay*

334 To develop an assay to measure dimerization of ACE2, two separate plasmids were  
335 created encoding ACE2 fused in frame at its C terminus to one of the nanoBIT  
336 reporters, SmBIT or LgBIT (Figure 1A). When these constructs were expressed in  
337 HEK293 cells, luminescence was observed that was approximately 20% of that  
338 generated by expression of LgBIT and SmBIT fused to the protein kinase A  
339 regulatory (PRKAR2) and catalytic (PRKACA) subunits, respectively (positive  
340 control). Co-transfection of plasmids encoding ACE2 fused to either LgBIT or SmBIT  
341 and PRKAR2 or PRKACA subunits fused to the complementary nanobit reporter did  
342 not generate luminescence, suggesting that the assay measured ACE2 dimerization  
343 (Figure 1B). Luminescence was also not observed when cells were transfected with  
344 nanoBIT-tagged ATG5 and PRKAR2, two proteins known not to interact (Figure 1B).  
345 To confirm the assay measured ACE2 dimerization, cells were transfected with a  
346 plasmid encoding untagged ACE2 as well as ACE2 tagged with LgBIT or SmBIT.  
347 The untagged ACE2 was expressed under the control of a CMV promoter, which  
348 provides substantially higher-level expression than the HSV TK promoter which  
349 controls the expression of the NanoBIT-tagged ACE2. If the assay measures  
350 dimerization, expression of the untagged ACE2 would be expected to suppress the  
351 luminescence by competing with the tagged ACE2 in dimers. To ensure the effect  
352 observed did not result from competition for transcription factors, rather than as a  
353 result of the untagged ACE2 competing with NanoBIT tagged ACE2, an unrelated  
354 gene (prolactin-PRL) was also expressed under the control of the CMV promoter.  
355 High level expression of untagged ACE2 suppressed the luminescence signal  
356 generated by ACE2 tagged with the NanoBIT reporters but it did not suppress the  
357 luminescence measured with the NanoBIT-tagged protein kinase A subunits (Figure  
358 1C).

359

### 360 *Identification of ACE2 dimerization modulators*

361 The assay was used to screen a custom in-house library of approximately 100  
362 approved drugs at a final concentration equal to their  $C_{max}$  in patients (FMC1 Library  
363 (19)). Sodium valproate and clofibrate both increased the dimerization signal by

364 approximately 33% and 56%, respectively. To confirm this, fresh compounds were  
365 purchased and retested at a concentration equal to their  $C_{max}$  in patients and  
366 multiples of this. Both compounds significantly increased the measured  
367 luminescence, confirming the results of the screen (Figure 1D). Although clofibrate  
368 has previously been approved, it has subsequently been withdrawn due to  
369 unacceptable toxicity (21). However, several other fibrates are still in clinical use.  
370 Apart from fenofibrate, these all bear a carboxylic acid whereas fenofibrate is an  
371 isopropyl ester pro-drug of fenofibric acid (Figure S1). Noting that sodium valproate  
372 is also a lipophilic carboxylic acid, fenofibric acid was tested in the dimerization  
373 assay. All of the fibrates (tested at 230  $\mu$ M, the  $C_{ss}$  of clofibrate (22)) modestly, but  
374 significantly, increased luminescence (Figure 1E). However, they also substantially  
375 decreased the luminescence generated by mixing LgBIT with HiBIT-tagged RBD  
376 (which binds LgBIT with high affinity and independently of other interacting  
377 molecules). This suggested that the drugs inhibited nanoluc directly and the  
378 measured luminescence underestimated dimerization. When the luminescence  
379 measured in the assay was corrected to take into account inhibition of  
380 nanoluciferase (Fig 1E, corrected data), fenofibric acid emerged as the most  
381 effective, apparently increasing dimerization by approximately two-fold. In contrast to  
382 this, fenofibrate did not increase the dimerization. The increase in luminescence was  
383 also time-dependant, reaching a maximum after 30 minutes exposure to the drug  
384 (Figure S2).

385 To confirm these results, HEK-293 cells were transfected with plasmids encoding  
386 ACE2 tagged with streptavidin binding protein and a His-tag or ACE2 with a FLAG  
387 tag. Cells were exposed to drug, lysed and ACE2 complexes purified using  
388 streptavidin beads. Following immunoblotting, ACE2-Flag was only detected in  
389 lysates from cells transfected with both plasmids and not from cells transfected with  
390 one plasmid alone, confirming the assay measured the interaction of ACE2.  
391 However, when cells were exposed to the fibrates, the amount of ACE2-FLAG  
392 detected on the beads was not substantially altered (Figure S3).

393

394 *Effect of fibrates on S protein RBD*

395 To evaluate whether fibrates affect the viral spike protein RBD, the thermal stability  
396 of RBD in the presence and absence of fibrates was investigated using differential  
397 scanning fluorimetry (DSF). Changes in the  $T_m$  of a protein in the presence of a  
398 ligand is indicative of binding and has previously been utilised to probe for protein-  
399 ligand interactions (23). All of the fibrates altered the  $T_m$  of RBD (46.4°C) although  
400 the greatest destabilization was observed with bezafibrate and ciprofibrate (both  $\Delta T_m$   
401 =-1.9°C, (Figure S4). A smaller effect was observed with fenofibric acid ( $\Delta T_m$  =-  
402 1.4°C) but this was detectable at concentrations as low as 30  $\mu$ M (Figure 2A, B).  
403 Although fenofibrate also destabilized RBD, this was only observed at higher drug  
404 concentrations ( $\geq 270 \mu$ M, Figure S4). Acetate, a carboxylic acid lacking the lipophilic  
405 moieties found in the fibrates, had no significant effect on RBD  $T_m$  (Figure S4)  
406 indicating that the lipophilic moieties are required.

407

#### 408 *Fenofibric acid inhibits ACE2-RBD binding*

409 An ELISA assay consisting of immobilised, recombinant ACE2 was employed to  
410 determine the inhibitory effect of fibrates on RBD-ACE2 binding. All fibrates  
411 screened demonstrated significant inhibition of binding at a concentration of 230  $\mu$ M,  
412 the  $C_{max}$  of clofibrate (Figure 2C). The binding of RBD to ACE2 expressed in COS  
413 cells was measured as previously described (12). When these assays were  
414 conducted on ice to minimize endocytosis, no inhibition of RBD binding was  
415 observed with any of the fibrates (Figure S5). However, when the assay was  
416 adapted for use at 37°C by using shorter incubation times, fenofibric acid was found  
417 to modestly, but significantly, inhibit RBD binding to ACE2 (Figure 2D). This was not  
418 due to toxicity as  $99 \pm 1\%$  ( $n=4$ ) of the cells excluded trypan blue after a similar  
419 exposure to drug. Furthermore, in a preliminary experiment, fenofibric acid inhibited  
420 binding to fixed Vero cells (Figure S5). Combined, these data indicate that  
421 fenofibrate/fenofibric acid interfere with spike RBD binding to ACE2.

422

#### 423 *Fenofibrate inhibits infection of Vero cells by the hCoV-19/England/2/2020 virus* 424 *isolate*

425 To evaluate the potential therapeutic effect of fenofibrate/fenofibric acid on SARS-  
426 CoV-2 virus, infection experiments were performed independently in two separate  
427 laboratories. Using the hCoV-19/England/2/2020 virus strain, Vero cells were co-  
428 incubated with virus and fibrates before fixing and staining for spike protein and  
429 counterstaining nuclei with Hoescht. Using live virus allows measurement of both  
430 primary infection after 24 hours by the viral inoculum and subsequent reinfection by  
431 virus released by Vero cells in the wells (after 48 hours). By 48 hours, 59% of Vero  
432 cells stained positive for spike protein in virus control wells with minimal loss of cell  
433 numbers (Figure 3 A & B, Figure S6). Consistent with the binding assays, and of the  
434 fibrates studied (all screened at 230  $\mu$ M), only fenofibrate reduced virus infection by  
435 ~65% to 18% compared to virus control (Figure 3B, Figure S5). This was not  
436 attributable to loss of Vero cell viability as no decrease in cell number by fenofibrate  
437 was seen as measured by number of nuclei (Figure 3B, Figure S5) and by Cell Titre  
438 Blue assay (Figure S8). No difference was observed when cells were pretreated or  
439 co-treated with drug and virus (data not shown). Parallel experiments were  
440 performed with a panel of statins (simvastatin, pitavastatin, rosuvastatin and  
441 pravastatin, Figure S1), drugs which have largely replaced fibrates as front-line  
442 therapy for reducing cholesterol levels and treating lipid disorders. When screened  
443 at 100 nM, a significant decrease in infection rates was observed with simvastatin  
444 and pitavastatin but not with pravastatin or rosuvastatin (Figure 3 C & D). However,  
445 this decrease was associated with significant loss of Vero cell viability as measured  
446 by decrease in number of nuclei (Figure 3 C & D; Figure S6-S7) and cell titre blue  
447 assay. Titration experiments were performed with simvastatin and pitavastatin on  
448 Vero cells and viability assessed in the absence of virus. A concentration of 10 nM  
449 did not affect Vero cell viability after 48 hours and no reduction in infection was  
450 observed (Figure S7) indicating that this panel of statins do not modulate SARS-  
451 CoV-2 infection, at least not *in vitro*.

452 Subsequent experiments assessed the effect of fenofibrate and fenofibric acid on  
453 infection by SARS-CoV-2. Within 24 hours, fenofibrate had significantly reduced  
454 infection levels by ~60% indicating that fenofibrate is able to inhibit primary infection  
455 (Figure 4 A & B). A reduction was also observed with fenofibric acid, albeit less than  
456 fenofibrate, however the results were more variable in the experiments performed  
457 and did not reach significance (Figure 4A-B). This pattern was recapitulated at 48

458 hours (Figure 4C-D) indicating that suppression of infection by fenofibrate is  
459 sustained. These data indicate that fenofibrate, and to a lesser extent fenofibric acid,  
460 are able to reduce primary infection and also secondary infection rates.

461 To determine virus levels in cell culture supernatant, virus RNA levels were  
462 measured by multiplex qRT-PCR for viral ORF1ab and N genes on heat-inactivated  
463 culture supernatant from 48 hour experiments. Whilst ORF1ab RNA levels were  
464 detectable in virus control supernatant, no signal was detected in supernatant from  
465 drug-treated cells implying, but not proving, a reduction in virus RNA (data not  
466 shown). However, a signal for the viral N-gene was detectable by qRT-PCR in all  
467 samples. Consistent with the reductions seen in infection levels, fenofibrate  
468 significantly reduced viral N-gene RNA levels whereas the results with fenofibric acid  
469 were more variable (Figure 4E). Furthermore, the effect of fenofibrate on infection  
470 rates and viral RNA levels in culture supernatant was dose-dependent as determined  
471 by doubling dilution experiments (1x: 230  $\mu$ M; Figure 5 A & B). Fenofibrate works as  
472 an anti-hyperlipidaemia agent by acting as a PPAR $\alpha$  agonist. Treatment with the  
473 PPAR-alpha antagonist GW6471 did not significantly alter the anti-viral actions of  
474 fenofibrate (Figure 5 C & D) suggesting that the antiviral actions of fenofibrate in this  
475 system are independent of PPAR $\alpha$ .

476

#### 477 *Fenofibrate inhibits infection of Vero cells by the Italy/UniSR1/2020 virus isolate*

478 To confirm the infection results observed with hCOV-19/England/2/2020 isolate in  
479 experiments performed at the University of Birmingham, the effect of fenofibrate and  
480 fenofibric acid was assessed on plaque formation in Vero cells infected with the  
481 Italy/UniSR1/2020 SARS-CoV-2 isolate independently at San Raffaele Scientific  
482 Institute in Milan. Vero cells were pretreated for 1 hour with fenofibrate or fenofibric  
483 acid or were exposed to the drug and the virus at the same time (co-treatment).  
484 Fenofibric acid inhibited plaque formation at concentrations clinically achievable in  
485 patients. The reduction of plaque formation by fenofibric acid reached 62% at 50 $\mu$ M  
486 drug in the co-treatment condition (Figure 6). Fenofibrate also reduced the number  
487 of plaques formed, but notably less potently. As observed for the hCOV-  
488 19/England/2/2020 strain, no difference was observed between pre-treatment and  
489 co-treatment experiments.



490 Thus, using two different virus isolates, we demonstrate that fenofibrate, or its active  
491 metabolite fenofibric acid, are able to significantly reduce SARS-CoV-2 infection in  
492 cell culture models.

493

494

## 495 **Discussion**

496 The development of new more infectious SARS-CoV-2 variants has resulted in a  
497 rapid expansion in infection rates and deaths in several countries around the world,  
498 especially the UK,US and Europe. Whilst vaccine programmes will hopefully reduce  
499 infection rates and virus spread in the longer term, there is still an urgent need to  
500 expand our arsenal of drugs to treat SARS-CoV-2-positive patients. Using an  
501 unsupervised approach, we have identified that the off-patent licensed drug  
502 fenofibrate has the potential to treat SARS-CoV-2 infections. The drug was identified  
503 through a screen of approved drugs to identify those which alter dimerization of  
504 ACE2. Clofibrate was identified as a hit in this screen and testing of other fibrates led  
505 to the identification of fenofibrate as being the most likely to be effective as an  
506 antiviral agent. Fenofibrate also appears to affect the stability of spike protein RBD  
507 and inhibit binding to ACE2. Importantly, these effects on RBD by fenofibrate  
508 correlated with decreases in SARS-CoV-2 infection rates *in vitro* using two different  
509 virus assays (staining for Spike protein and plaque-formation) in two independent  
510 laboratories.

511 The ACE2 dimerization assays depends on the co-localization of LgBIT and SmBIT  
512 brought about by the formation of ACE2 dimers. No signal was observed using  
513 protein kinase A subunits that do not interact with ACE2 and over-expression of  
514 unlabelled ACE2 suppressed the signal from the nanobit reporters, giving confidence  
515 that the assay measures the interaction of ACE2 protomers. Although described  
516 here as a dimerization assay, the assay may not discriminate between dimer  
517 formation and higher-order oligomers, and drugs showing activity in the dimerization  
518 assay could alternatively elicit conformational changes in ACE2 complexes which  
519 improve the interaction of the nanobit reporters. All the fibrates tested showed some  
520 activity in the dimerization assays, but the most pronounced effects were observed  
521 with fenofibric acid. The pro-drug fenofibrate (the isopropyl ester of fenofibric acid)  
522 was inactive in this assay, suggesting the free carboxylic acid is necessary.

523 In addition to effects on ACE2, all the fibrates destabilized the viral spike protein  
524 RBD and lowered its “melting” temperature. However, the most potent effects were  
525 again seen with fenofibric acid. This may contribute to fenofibrate inhibiting binding

526 of RBD to ACE2 in ELISA and cell binding studies performed at 37°C. When  
527 measured in cells at 0°C, the fibrates did not inhibit binding to ACE2; this  
528 temperature is likely to prevent melting, providing a potential explanation for the lack  
529 of activity at fibrates in binding assays at lower temperatures. Blocking RBD binding  
530 to ACE2 was anticipated to reduce infection by SARS-CoV-2.

531 To provide robust data evaluating the potential of fenofibric acid/fenofibrate to inhibit  
532 infection by SARS-CoV-2, the drugs were evaluated independently in two separate  
533 laboratories using different assays and two different SARS-CoV-2 isolates (hCoV-  
534 19/England/2/2020 and Italy/UniSR1/2020). In both cases, fenofibrate/fenofibric acid  
535 were found to significantly reduce infection rates. Fenofibrate/fenofibric acid  
536 decreased the number of Vero cells staining positive for viral spike protein at 24  
537 hours indicating inhibition of primary infection. The number of cells infected 48 hours  
538 after infection was also significantly reduced, demonstrating the potential for  
539 sustained inhibition of infection. This was further confirmed by PCR which showed a  
540 reduction in viral mRNA released by the cells into the culture supernatant. Likewise,  
541 we saw significant reductions with fenofibric acid/fenofibrate in plaque formation  
542 assays which are considered the gold-standard assay for measuring infectivity by  
543 SARS-CoV-2. Several assays demonstrate that the reduced viral infection was not  
544 due to a cytotoxic effect of the fibrates in the host cells. Considering that fenofibrate  
545 is used in the treatment of hypercholesterolaemia and hyperlipidaemia, the effect of  
546 several statins on SARS-CoV-2 infection was also assessed. These included both  
547 hydrophilic (pravastatin, rosuvastatin) and lipophilic statins (pitavastatin,  
548 simvastatin). None of the statins inhibited viral infection, suggesting the anti-viral  
549 effect was not mediated by inhibition of cholesterol synthesis. The differences we  
550 observed in potency between fenofibrate and fenofibric acid in the two antiviral  
551 assays may reflect different strains of the virus or different methodologies. Although  
552 we cannot presently fully explain these, it is clear that fenofibrate or its metabolite  
553 fenofibric acid demonstrated anti-SARS-CoV-2 activity.

554 Fenofibric acid was identified as a potential anti-viral agent through its effects on  
555 ACE2 dimerization, but it remains to be clarified to what extent the effects of  
556 fenofibrate/fenofibric acid on dimerization contribute to its anti-viral activity. The  
557 mechanism by which increased dimerization could inhibit viral infection was not  
558 investigated and several explanations are plausible. It was not possible to measure

559 an effect of fibrates on dimerization of ACE2 in streptavidin precipitation assays. This  
560 may reflect the insensitivity of this latter method or that fenofibrate alters the  
561 conformation of ACE2 rather than inducing dimerization. Structural studies have  
562 shown that ACE2 adopts “open” and “closed” conformations (13) which may be  
563 detected by the nanobit reporters. The open and closed conformations may also  
564 affect RBD binding to each ACE2 protomer or the number of spike proteins that can  
565 bind to an ACE2 dimer, thereby affecting the avidity of the virus for cells.  
566 Conformational changes in ACE2 may also affect its susceptibility to proteolysis by  
567 TMPRSS2. The suggestion that the anti-viral activity of fenofibrate depends at least  
568 in part on effects on ACE2 also offers advantages over drugs which inhibit viral  
569 proteins. Mutations in the viral genome are less likely to affect the antiviral activity of  
570 drugs which target human rather than viral proteins. Excitingly, fenofibrate also  
571 destabilized the RBD and reduced binding of it to ACE2. It is highly likely that this  
572 contributes to the reduced infection in cells treated with fenofibrate. This also  
573 suggests that fenofibrate has multiple mechanisms of action, making it less likely that  
574 resistance to it will quickly emerge and fenofibrate may retain activity against newly  
575 emerging strains of SARS-CoV-2. However, our data suggest that the antiviral  
576 activity of fenofibrate measured in the infection assays presented here is not  
577 mediated by the transcription factor PPAR $\alpha$ . The efficacy of fibrates in the treatment  
578 of hyperlipidaemia depends on their ability to activate PPAR $\alpha$ . However, GW6471, a  
579 PPAR $\alpha$  antagonist (24), did not prevent fenofibrate from inhibiting viral infection.

580 To our knowledge, this is the first experimental evidence that fenofibrate can  
581 modulate RBD and ACE2 proteins and inhibit SARS-CoV-2 infection. Importantly,  
582 others have also proposed its therapeutic use in SARS-CoV-2. Fenofibrate increases  
583 the levels of the glycosphingolipid sulfatide and this has been proposed to reduce  
584 SARS-CoV-2 infection (25). SARS-CoV-2 infection is associated with overproduction  
585 of cytokines, such as TNF- $\alpha$ , IFN- $\gamma$ , IL-1, IL-2 and IL-6, and subsequently a cytokine  
586 storm that induces several extrapulmonary complications including myocardial injury,  
587 myocarditis, acute kidney injury, impaired ion transport, acute liver injury, and  
588 gastrointestinal manifestations such as diarrhea and vomiting (26,27). Similar to  
589 dexamethasone, fenofibrate has been shown to suppress airway inflammation and  
590 cytokine release including TNF- $\alpha$ , IL-1 and IFN- $\gamma$  in both mouse and human studies  
591 (28-30). Fenofibrate has also been shown to have antithrombotic and antiplatelet

592 activities (31,32) reduce fibrinogen levels and increase clot permeability thereby  
593 enhancing fibrinolysis (33). These properties may reduce or prevent  
594 hypercoagulability seen in the late stage of disease in many SARS-CoV-2 patients  
595 (34). A metanalysis has also suggested fenofibrate may be useful in the treatment of  
596 Hepatitis C infection (35). Lastly, we note a preprint from the group of Nahmias that  
597 has also suggested fenofibrate may have clinical effects against SARS-CoV-2  
598 infection which depends on the PPAR $\alpha$  mediated alterations in host cell metabolism  
599 (36). Based on the data in this preprint, two clinical trials have been registered using  
600 fenofibrate in SARS-CoV-2 patients requiring hospitalisation (Hospital of the  
601 University of Pennsylvania (NCT04517396), and Hebrew University of Jerusalem  
602 (NCT04661930)).

603 Given the currently acceleration in infection and death rates observed in several  
604 countries, especially the UK, we strongly advocate clinical trials of fenofibrate in  
605 patients with SARS-CoV-2 requiring hospitalisation. Fenofibrate has a relatively safe  
606 history of use, the most common adverse effects being abdominal  
607 pain, diarrhoea, flatulence, nausea and vomiting. The half-life of fenofibric acid is 20  
608 hours (37), allowing convenient once daily dosing. The recommended doses in the  
609 UK (up to 267 mg) provide plasma concentrations ( $C_{max}$  70  $\mu$ M,  $C_{ss}$  50  $\mu$ M)  
610 comparable to those at which we and others have seen anti-viral activity, Finally, if  
611 proven effective, fenofibrate is available as a “generic” drug and consequently is  
612 relatively cheap, making it accessible for use in all clinical settings, especially those  
613 in low and middle income countries. Further studies to clarify the precise mechanism  
614 of the anti-viral activity of fenofibrate are desirable, but this should not delay the  
615 urgent clinical evaluation of the drug to counter the current pandemic.

616

617

618 **Figures**

Figure 1

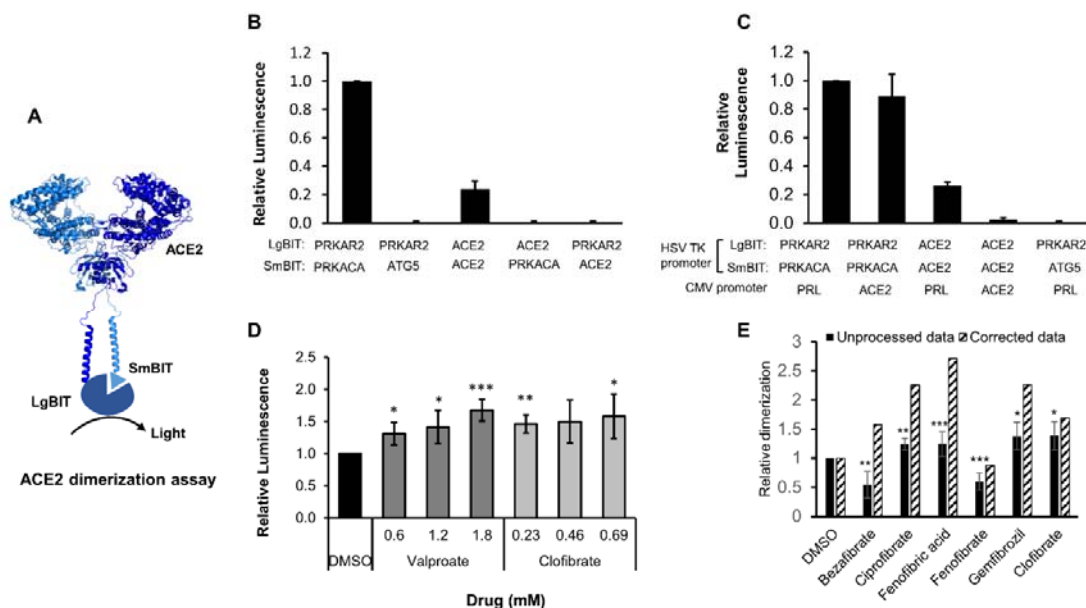

619

620 **Figure 1. ACE2 dimerization assay.** **A.** Schematic showing ACE2 tagged with  
621 LgBIT and SmBIT. **B.** HEK-293 cells were transfected with combinations of plasmids  
622 encoding LgBIT or SmBIT fused to either protein kinase A regulatory subunit  
623 (PRKAR2) or catalytic subunit (PRKACA), ATG5 or ACE2. The results (mean  $\pm$  S.D.,  
624  $n = 5$ ) were normalized to the luminescence measured in cells transfected with  
625 protein kinase A reporters (positive control). **C.** HEK-293 cells were transfected with  
626 plasmids encoding ACE2 nanoBIT reporters under the control of the HSV TK  
627 promoter and ACE2 or prolactin (PRL) under the control of the CMV promoter. The  
628 results (mean  $\pm$  S.D.,  $n = 4$ ) were normalized to the luminescence measured in cells  
629 transfected with protein kinase A reporters and prolactin. **D.** HEK-293 cells were  
630 transfected with NanoBIT-tagged ACE2 reporters and incubated with sodium  
631 valproate or clofibrate at a concentration equal to 1x, 2x or 3x the reported  $C_{max}$  of  
632 the drug. After 1 hour, luminescence was measured and normalized (mean  $\pm$  S.D.,  $n$   
633 =4) to that measured in cells treated with DMSO. **E.** A series of other fibrates were  
634 similarly evaluated in the assay. The luminescence measured (mean  $\pm$  S.D.,  $n = 5$ -  
635 11, solid bars) was significantly different to that measured in cells treated with

636 solvent where shown. When these fibrates were incubated with purified LgBIT and  
637 HiBIT-RBD to create a constitutively active nanoluc, each of these fibrates were  
638 found to inhibit nanoluciferase (bezafibrate  $35 \pm 7$  %, ciprofibrate  $55 \pm 6$  %, fenofibric  
639 acid  $46 \pm 3$  %, fenofibrate  $69 \pm 5$  %, gemfibrozil  $61 \pm 2$  % of the activity measured in  
640 the presence of DMSO). To correct for this, the luminescence measurements from  
641 cells treated with fibrates in cells were divided by these latter values to estimate the  
642 effect of the drugs on dimerization (hatched bars). Significant difference from control  
643 is shown as \*,  $P < 0.05$ ; \*\*,  $P < 0.01$ ; \*\*\*,  $P < 0.005$ .

644

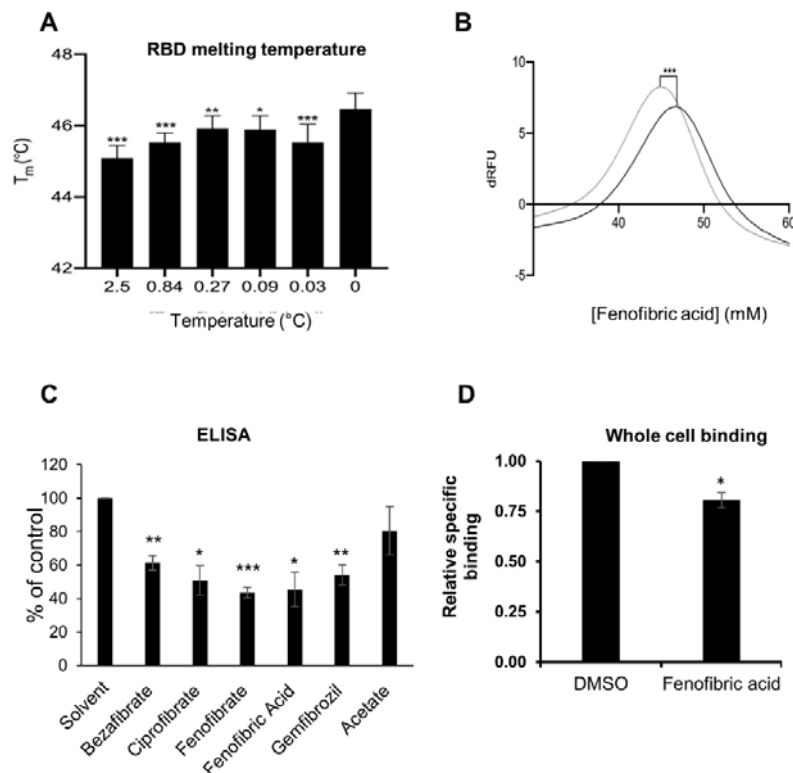

645

646 **Figure 2 Effect of fenofibrates on RBD and RBD binding to ACE2** **A.** Differential  
647 scanning fluorimetry. The  $T_m$  of 1  $\mu$ g RBD alone or with increasing concentrations of  
648 fenofibric acid. The results (mean  $\pm$  S.D.,  $n=3$ ) were significantly different from RBD  
649 where shown (\*\*\*,  $P < 0.001$ ; \*\*,  $P < 0.01$ ; \*,  $P < 0.05$ ; paired t-test). **B.** First  
650 differential of the thermal stability of 1  $\mu$ g RBD alone (solid line) or with 2.5 mM  
651 fenofibric acid (dotted line). A direct interaction of fenofibric acid with SYPRO™  
652 Orange dye (in the absence of RBD) was not observed. **C.** ELISA assay to measure  
653 inhibition of RBD binding to ACE2 by Fibrates. Biotinylated ACE2 was captured onto  
654 a high binding microplate coated with streptavidin prior to the addition of RBD pre-  
655 incubated with or without 230  $\mu$ M bezafibrate, ciprofibrate, fenofibrate, fenofibric  
656 acid, gemfibrozil or acetate control. Data (mean  $\pm$  S.D.,  $n=3$ ) represented as % no  
657 inhibitor control and are significantly different to this where shown (\*,  $P < 0.05$ ; \*\*,  
658  $P < 0.01$ ; \*\*\*,  $P < 0.005$ ). **D.** A Whole cell binding assay to measure inhibition of RBD  
659 binding to ACE2. COS cells were transfected with ACE2 and incubated on ice with  
660 HiBIT-tagged SARS-CoV-2 RBD and the indicated fibrate (230  $\mu$ M). After washing,  
661 the bound RBD was measured by addition of LgBIT and nanoluc substrate. The



662 results mean  $\pm$  S.D., n = 4) were normalized to the binding measured in cells  
663 exposed to DMSO and are significantly different where shown (\*,  $P < 0.005$ ).

664

665

**A**

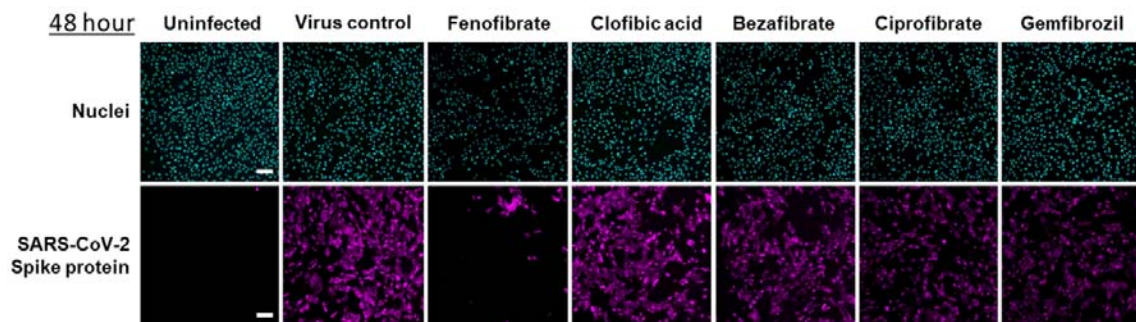

**B**

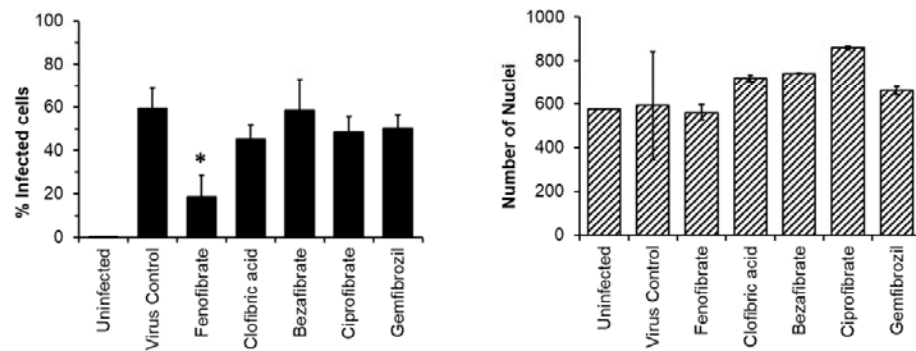

**C**

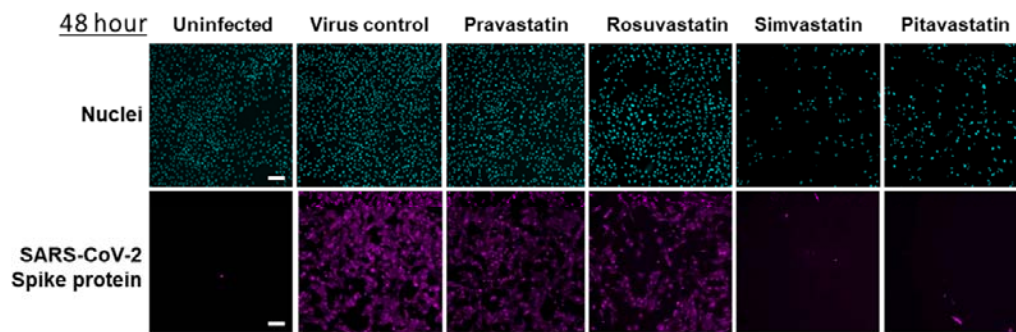

**D**

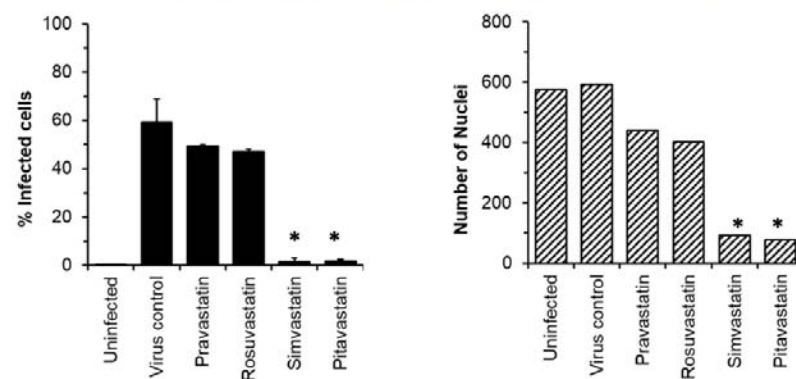

666

667 **Figure 3. Fenofibrate reduces SARS-CoV-2 infection rates in vitro.** Vero cells  
668 were plated into 96 well plates ( $8 \times 10^3$  cells/well) for 24 hours before infecting with  
669 167 IU of hCOV-19/England/2/2020 virus isolate in the absence or presence of  
670 drugs. Infection rates were assessed at 48 hours by staining Vero cells for viral  
671 Spike protein and counterstaining nuclei with Hoescht. Cells were imaged and  
672 analysed using a Thermo Scientific CellInsight CX5 High-Content Screening (HCS)  
673 platform. Representative images and mean data are shown for Vero cells incubated  
674 with either no virus, SARS-CoV-2 virus control, or virus and fibrates (230 $\mu$ M, **(A and**  
675 **B)** or statins (100nM, **C and D**). The black bars are % infected cells and the hatched  
676 grey bars are average number of nuclei score per field of view (mean  $\pm$  S.D., n=2-3;  
677 one-way ANOVA. \*,  $P < 0.05$  compared to virus control).

678

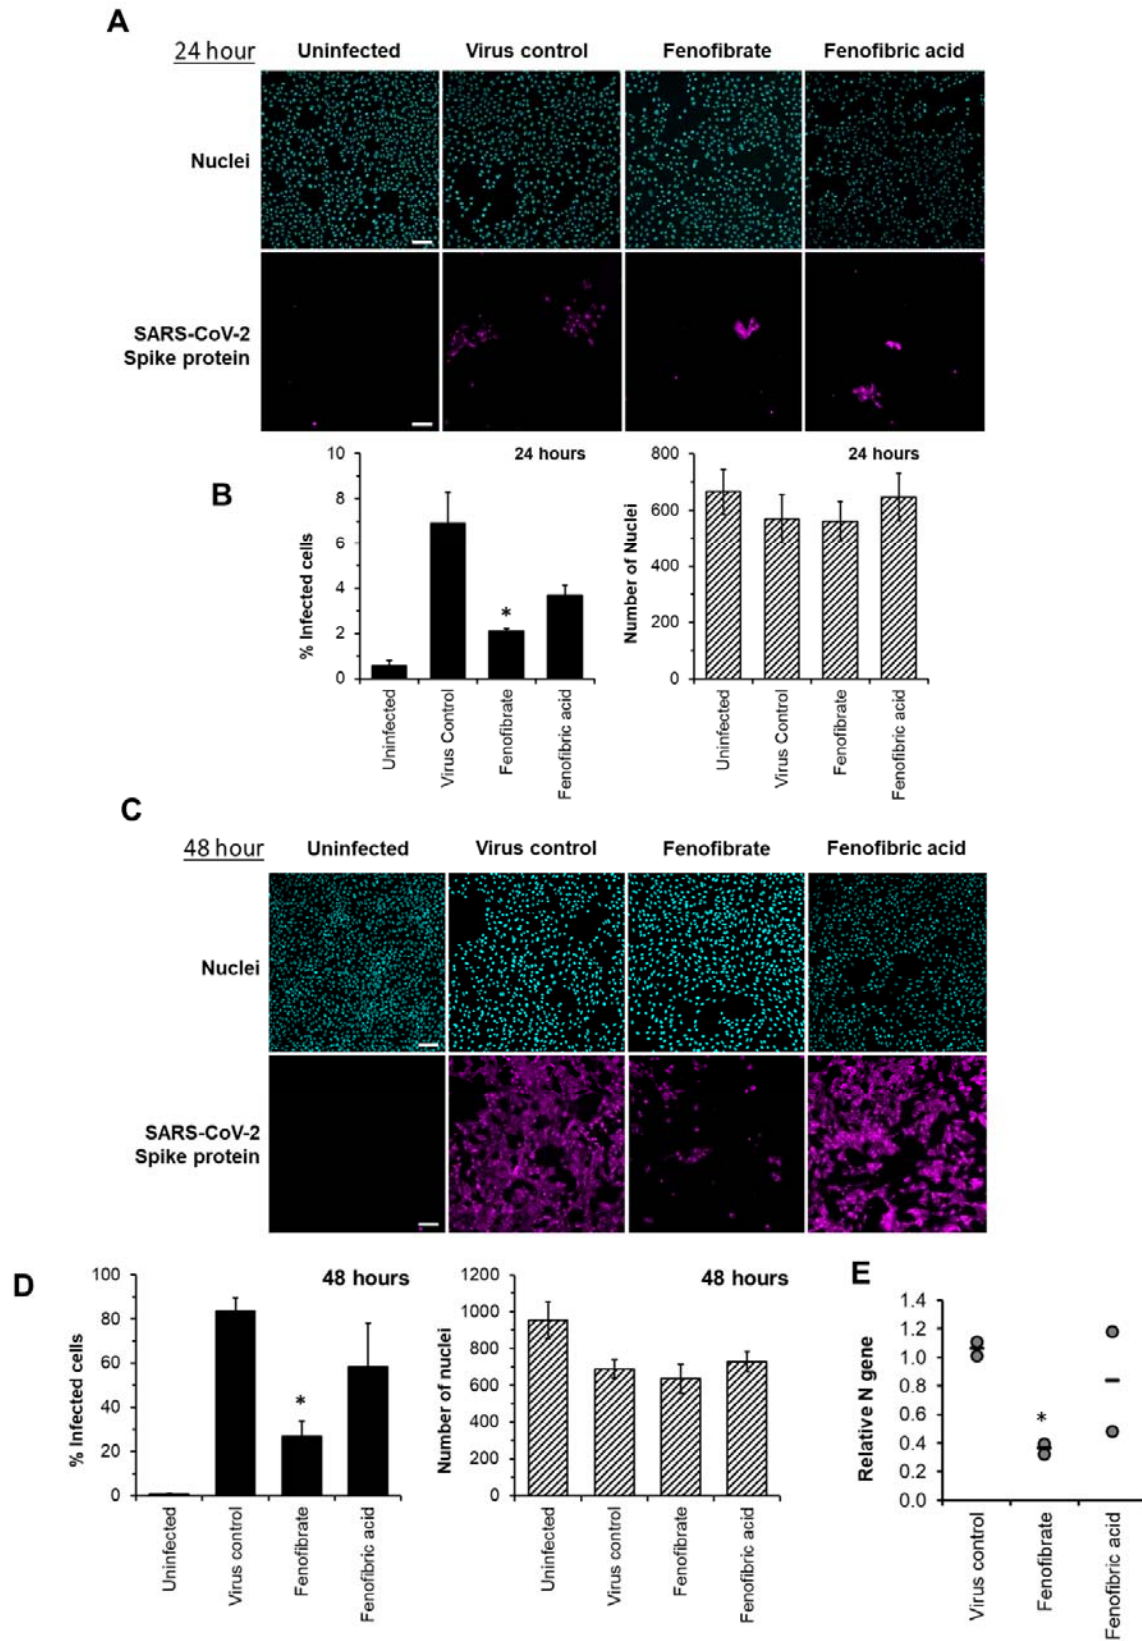

679

680

681 **Figure 4. Fenofibrate, and to a lesser extent fenofibric acid, reduce SARS-CoV-**  
682 **2 infection at both 24 and 48 hours.** Vero cells were plated into 96 well plates  
683 ( $8 \times 10^3$  cells/well) for 24 hours before infecting with 167IU of hCOV-  
684 19/England/2/2020 virus isolate in the absence or presence of 230 $\mu$ M fenofibrate or  
685 fenofibric acid. Infection rates were assessed at 24 and 48 hours by staining Vero  
686 cells for viral Spike protein and counterstaining nuclei with Hoescht. Cells were  
687 imaged and analysed using a Thermo Scientific CellInsight CX5 High-Content  
688 Screening (HCS) platform. Representative images and mean data are shown for  
689 Vero cells incubated for 24 hours (**A** and **B**) and 48 hours (**C** and **D**). The black bars  
690 are % infected cells and the hatched grey bars are average number of nuclei score  
691 per field of view (mean  $\pm$ S.D. n = 2-3 one-way ANOVA, \*,  $P < 0.05$  compared to  
692 virus control). **E.** Supernatant was collected from wells after 48 hours of incubation.  
693 Virus was heat-inactivated and viral N gene RNA levels measured directly in  
694 supernatant using a commercial one-step RT-qPCR reaction. N RNA levels were  
695 calculated relative to supernatant from virus control (n=2 experiments).

696

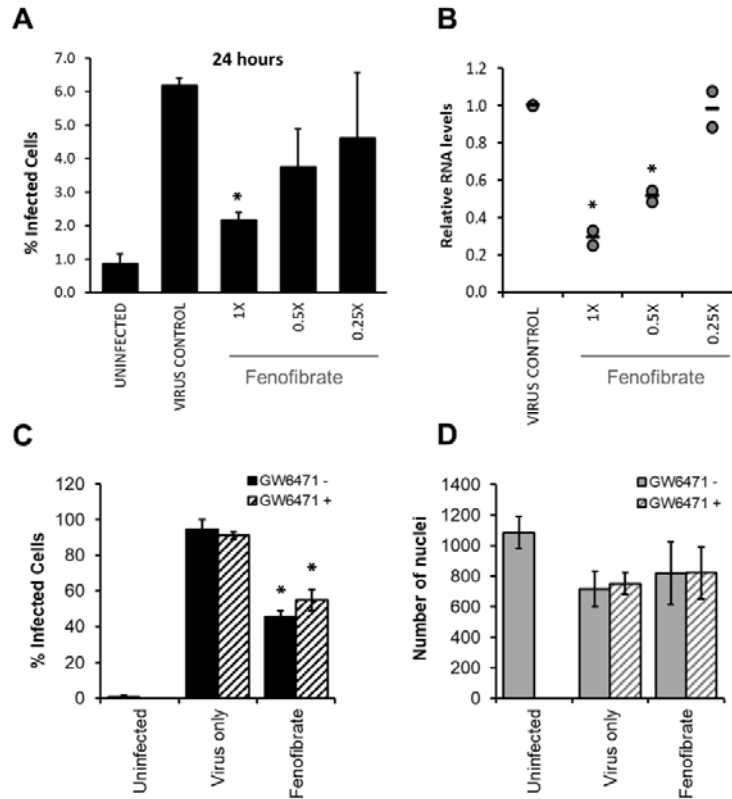

697

698 **Figure 5. Fenofibrate reduces SARS-CoV-2 infection level in vitro in a dose**  
699 **dependent manner.** Vero cells were plated into 96 well plates ( $8 \times 10^3$  cells/well) for  
700 24 hours before infecting with 167 IU of hCOV-19/England/2/2020 virus isolate in the  
701 absence or presence of 1x (230 $\mu$ M), 0.5x or 0.25x fenofibrate. Infection was  
702 assessed at 24 hours by staining Vero cells for viral Spike protein and  
703 counterstaining nuclei with Hoescht. Cells were imaged and analysed using a  
704 Thermo Scientific CellInsight CX5 High-Content Screening (HCS) platform. **(A)**  
705 Mean infection rates observed at 24 hours (n=2-3). **B.** Supernatant was collected  
706 from wells after 48 hours of incubation. Virus was heat-inactivated and viral N gene  
707 RNA levels measured directly in supernatant using a commercial one-step RT-qPCR  
708 reaction. N RNA levels were calculated relative to supernatant from virus control  
709 (n=2). To determine the role of PPAR $\alpha$ , 48 hour infection experiments were  
710 performed in the absence or presence of the PPAR-alpha antagonist GW6471 (1  
711  $\mu$ M). Mean data from 2-3 experiments are shown in **(C and D)**. **C** shows % infected  
712 cells and **D** the average number of nuclei score per field of view. Statistical

713 significance was calculated by one-way ANOVA. \*,  $P < 0.05$  compared to virus  
714 control.

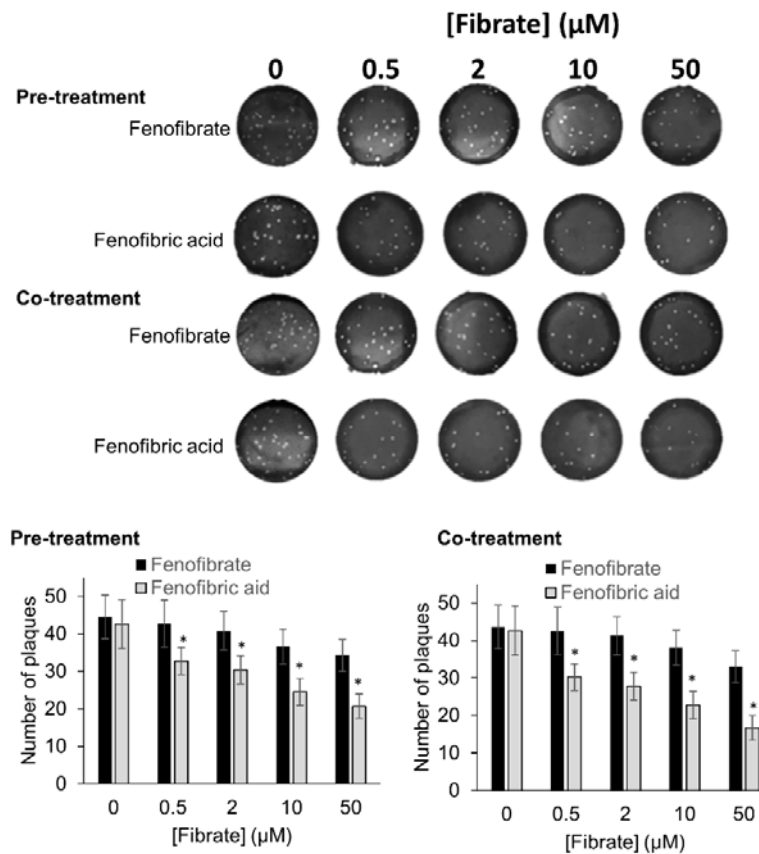

715

716 **Figure 6. Fibrate inhibition of SARS-COV-2 infection of Vero cells.** Antiviral  
717 effect of fibrates added 1 hour before infection or in co-treatment with infection in  
718 Vero cells with 50 PFU of SARS-CoV-2. N.D., not determined due to solubility issues.  
719 The results are expressed as number of PFU/well and represent the mean  $\pm$  SD of  
720 two experiments each with 3 separate plates containing duplicate samples. The  
721 number of plaques was significantly different (2 way Anova) in cells treated with  
722 fenofibric compared to fenofibrate where shown DMSO (\*,  $P < 0.001$ ). Compared to  
723 cells treated with drug solvent, the number of plaques was significantly different in  
724 cells treated with fenofibric acid ( $P < 0.001$ , all concentrations tested) and in cells  
725 treated with fenofibrate ( $P < 0.01$ , 10  $\mu\text{M}$  fenofibrate;  $P < 0.001$ , 50  $\mu\text{M}$  fenofibrate).

726

727 **ACKNOWLEDGEMENTS**

728 Keele University funded the work performed by AR. University of Birmingham  
729 internal funds were used for work performed in Birmingham (FK SPD, ZH and HJH).  
730 CJM, MAL and MAS were funded by the BBSRC (BB/LO23717/1; BIV-HVB-  
731 2020/07/SKIDMORE and BB/S009787/1). EV and IP were funded by Bando COVID-  
732 2020-12371617, Italian Ministry of Health. Z.Y. acknowledges the Danish National  
733 Research Foundation (DNRF107) and the Lundbeck Foundation, I.B was funded by  
734 GlycoSkin H2020-ERC GAP-772735, R.K. was funded by the European  
735 Commission (Glycolmaging H2020-MSCA-ITN-721297), Y-H.C was funded by the  
736 Innovation Fund Denmark and J.E.T. was funded by the University of Liverpool.

737

738 **CONTRIBUTIONS**

739 AR conceived the dimerization project and performed all experimental work with the  
740 nanobit assay, immunoprecipitation studies and live whole cell binding assays (Fig 1,  
741 2D, S2, S3, S5). FK designed the drug library and led the viral infection experiments  
742 and analysis in Birmingham (Figs 3-5, S6-S10) and performed them with SPD, ZH  
743 and HJH. MS led and ML, CJM and SG performed the biochemical studies (Fig 2A-  
744 C S4, S5B) EV led and IP performed the viral infection assays in Milan (Fig 6). Z.Y.  
745 & J.E.T. conceived, and purified the RBD-Fc protein, Y-H.C, R.K. and I.B.  
746 characterized the purified protein. AR and FK co-wrote the paper and all authors  
747 approved the final manuscript.

748

749 **CONFLICT OF INTEREST**

750 The authors declare no conflict of interest.

751



## 752 REFERENCES

- 753 (1) Wu F, Zhao S, Yu B, Chen YM, Wang W, Song ZG, et al. A new coronavirus  
754 associated with human respiratory disease in China. *Nature* 2020 March  
755 01;579(7798):265-269.
- 756 (2) Dhama K, Khan S, Tiwari R, Sircar S, Bhat S, Malik YS, et al. Coronavirus  
757 Disease 2019-COVID-19. *Clin Microbiol Rev* 2020 June  
758 24;33(4):10.1128/CMR.00028-20. Print 2020 Sep 16.
- 759 (3) World Health Organization. Coronavirus disease (COVID-19) pandemic. 2020;  
760 Available at: <https://www.who.int/emergencies/diseases/novel-coronavirus-2019>.
- 761 (4) Voysey M, Clemens SAC, Madhi SA, Weckx LY, Folegatti PM, Aley PK, et al.  
762 Safety and efficacy of the ChAdOx1 nCoV-19 vaccine (AZD1222) against SARS-  
763 CoV-2: an interim analysis of four randomised controlled trials in Brazil, South Africa,  
764 and the UK. *Lancet* 2020 December 08.
- 765 (5) Baden LR, El Sahly HM, Essink B, Kotloff K, Frey S, Novak R, et al. Efficacy and  
766 Safety of the mRNA-1273 SARS-CoV-2 Vaccine. *N Engl J Med* 2020 December 30.
- 767 (6) Hoffmann M, Kleine-Weber H, Schroeder S, Kruger N, Herrler T, Erichsen S, et  
768 al. SARS-CoV-2 Cell Entry Depends on ACE2 and TMPRSS2 and Is Blocked by a  
769 Clinically Proven Protease Inhibitor. *Cell* 2020 April 16;181(2):271-280.e8.
- 770 (7) Clausen TM, Sandoval DR, Spliid CB, Pihl J, Perrett HR, Painter CD, et al.  
771 SARS-CoV-2 Infection Depends on Cellular Heparan Sulfate and ACE2. *Cell* 2020  
772 November 12;183(4):1043-1057.e15.
- 773 (8) Cantuti-Castelvetri L, Ojha R, Pedro LD, Djannatian M, Franz J, Kuivanen S, et  
774 al. Neuropilin-1 facilitates SARS-CoV-2 cell entry and infectivity. *Science* 2020  
775 November 13;370(6518):856-860.
- 776 (9) Daly JL, Simonetti B, Klein K, Chen KE, Williamson MK, Anton-Plagaro C, et al.  
777 Neuropilin-1 is a host factor for SARS-CoV-2 infection. *Science* 2020 November  
778 13;370(6518):861-865.
- 779 (10) RECOVERY Collaborative Group, Horby P, Lim WS, Emberson JR, Mafham M,  
780 Bell JL, et al. Dexamethasone in Hospitalized Patients with Covid-19 - Preliminary  
781 Report. *N Engl J Med* 2020 July 17.
- 782 (11) Beigel JH, Tomashek KM, Dodd LE, Mehta AK, Zingman BS, Kalil AC, et al.  
783 Remdesivir for the Treatment of Covid-19 - Final Report. *N Engl J Med* 2020  
784 November 05;383(19):1813-1826.
- 785 (12) Lima MA, Skidmore M, Khanim F, Richardson A. Development of a nano-  
786 luciferase based assay to measure the binding of SARS-CoV-2 spike receptor  
787 binding domain to ACE-2. *Biochem Biophys Res Commun* 2020 November 17.

- 788 (13) Yan R, Zhang Y, Li Y, Xia L, Guo Y, Zhou Q. Structural basis for the recognition  
789 of SARS-CoV-2 by full-length human ACE2. *Science* 2020 March  
790 27;367(6485):1444-1448.
- 791 (14) Barros EP, Casalino L, Gaieb Z, Dommer AC, Wang Y, Fallon L, et al. The  
792 Flexibility of ACE2 in the Context of SARS-CoV-2 Infection. *Biophys J* 2020  
793 November 13.
- 794 (15) Opalinski L, Sokolowska-Wedzina A, Szczepara M, Zakrzewska M, Otlewski J.  
795 Antibody-induced dimerization of FGFR1 promotes receptor endocytosis  
796 independently of its kinase activity. *Sci Rep* 2017 August 02;7(1):7121-z.
- 797 (16) Wang Q, Villeneuve G, Wang Z. Control of epidermal growth factor receptor  
798 endocytosis by receptor dimerization, rather than receptor kinase activation. *EMBO*  
799 *Rep* 2005 October 01;6(10):942-948.
- 800 (17) Gent J, van Kerkhof P, Roza M, Bu G, Strous GJ. Ligand-independent growth  
801 hormone receptor dimerization occurs in the endoplasmic reticulum and is required  
802 for ubiquitin system-dependent endocytosis. *Proc Natl Acad Sci U S A* 2002 July  
803 23;99(15):9858-9863.
- 804 (18) Dixon AS, Schwinn MK, Hall MP, Zimmerman K, Otto P, Lubben TH, et al.  
805 NanoLuc Complementation Reporter Optimized for Accurate Measurement of  
806 Protein Interactions in Cells. *ACS Chem Biol* 2016 February 19;11(2):400-408.
- 807 (19) Khanim FL, Merrick BA, Giles HV, Jankute M, Jackson JB, Giles LJ, et al.  
808 Redeployment-based drug screening identifies the anti-helminthic niclosamide as  
809 anti-myeloma therapy that also reduces free light chain production. *Blood Cancer J*  
810 2011 October 01;1(10):e39.
- 811 (20) Richardson A, Malik RK, Hildebrand JD, Parsons JT. Inhibition of cell spreading  
812 by expression of the C-terminal domain of focal adhesion kinase (FAK) is rescued by  
813 coexpression of Src or catalytically inactive FAK: a role for paxillin tyrosine  
814 phosphorylation. *Mol Cell Biol* 1997 Dec;17(12):6906-6914.
- 815 (21) Oliver M. The clofibrate saga: a retrospective commentary. *Br J Clin Pharmacol*  
816 2012 December 01;74(6):907-910.
- 817 (22) Mannisto PT, Tuomisto J, Jounela A, Penttila O. Pharmacokinetics of clofibrate  
818 and chlorophenoxy isobutyric acid. I. Cross-over studies on human volunteers. *Acta*  
819 *Pharmacol Toxicol (Copenh)* 1975 April 01;36(4):353-365.
- 820 (23) Niesen FH, Berglund H, Vedadi M. The use of differential scanning fluorimetry  
821 to detect ligand interactions that promote protein stability. *Nat Protoc*  
822 2007;2(9):2212-2221.
- 823 (24) Xu HE, Stanley TB, Montana VG, Lambert MH, Shearer BG, Cobb JE, et al.  
824 Structural basis for antagonist-mediated recruitment of nuclear co-repressors by  
825 PPARalpha. *Nature* 2002 February 14;415(6873):813-817.

- 826 (25) Buschard K. Fenofibrate increases the amount of sulfatide which seems  
827 beneficial against Covid-19. *Med Hypotheses* 2020 October 01;143:110127.
- 828 (26) Gupta A, Madhavan MV, Sehgal K, Nair N, Mahajan S, Sehrawat TS, et al.  
829 Extrapulmonary manifestations of COVID-19. *Nat Med* 2020 July 01;26(7):1017-  
830 1032.
- 831 (27) Lee C, Choi WJ. Overview of COVID-19 inflammatory pathogenesis from the  
832 therapeutic perspective. *Arch Pharm Res* 2021 January 04.
- 833 (28) Delayre-Orthez C, Becker J, Auwerx J, Frossard N, Pons F. Suppression of  
834 allergen-induced airway inflammation and immune response by the peroxisome  
835 proliferator-activated receptor-alpha agonist fenofibrate. *Eur J Pharmacol* 2008  
836 February 26;581(1-2):177-184.
- 837 (29) Stolarz AJ, Farris RA, Wiley CA, O'Brien CE, Price ET. Fenofibrate Attenuates  
838 Neutrophilic Inflammation in Airway Epithelia: Potential Drug Repurposing for Cystic  
839 Fibrosis. *Clin Transl Sci* 2015 December 01;8(6):696-701.
- 840 (30) Madej A, Okopien B, Kowalski J, Zielinski M, Wysocki J, Szygula B, et al.  
841 Effects of fenofibrate on plasma cytokine concentrations in patients with  
842 atherosclerosis and hyperlipoproteinemia IIb. *Int J Clin Pharmacol Ther* 1998 June  
843 01;36(6):345-349.
- 844 (31) Lee JJ, Jin YR, Yu JY, Munkhtsetseg T, Park ES, Lim Y, et al. Antithrombotic  
845 and antiplatelet activities of fenofibrate, a lipid-lowering drug. *Atherosclerosis* 2009  
846 October 01;206(2):375-382.
- 847 (32) Jeanpierre E, Le Tourneau T, Zawadzki C, Van Belle E, Mouquet F, Susen S, et  
848 al. Beneficial effects of fenofibrate on plaque thrombogenicity and plaque stability in  
849 atherosclerotic rabbits. *Cardiovasc Pathol* 2009 June 01;18(3):140-147.
- 850 (33) Undas A, Celinska-Lowenhoff M, Lowenhoff T, Szczeklik A. Statins, fenofibrate,  
851 and quinapril increase clot permeability and enhance fibrinolysis in patients with  
852 coronary artery disease. *J Thromb Haemost* 2006 May 01;4(5):1029-1036.
- 853 (34) Rogosnitzky M, Berkowitz E, Jadad AR. Delivering Benefits at Speed Through  
854 Real-World Repurposing of Off-Patent Drugs: The COVID-19 Pandemic as a Case in  
855 Point. *JMIR Public Health Surveill* 2020 May 13;6(2):e19199.
- 856 (35) Grammatikos G, Farnik H, Bon D, Bohlig A, Bader T, Berg T, et al. The impact  
857 of antihyperlipidemic drugs on the viral load of patients with chronic hepatitis C  
858 infection: a meta-analysis. *J Viral Hepat* 2014 August 01;21(8):533-541.
- 859 (36) Avner E, Skyler U, Ioannidis K, Hofree M, tenOever BR, Nahmias Y. The SARS-  
860 CoV-2 Transcriptional Metabolic Signature in Lung Epithelium. . 2020.
- 861 (37) Desager JP, Horsmans Y, Vandenplas C, Harvengt C. Pharmacodynamic  
862 activity of lipoprotein lipase and hepatic lipase, and pharmacokinetic parameters  
863 measured in normolipidaemic subjects receiving ciprofibrate (100 or 200 mg/day) or

864 micronised fenofibrate (200 mg/day) therapy for 23 days. *Atherosclerosis* 1996 July  
865 01;124 Suppl:65.

866

867

868
